# Supplementary material
Source: PubMed Central journal article supplement (PMC7011119)
Supplement: NIHMS1553320-supplement-1.pdf [file NIHMS1553320-supplement-1.pdf]

**Cell Reports, Volume 30**

**Supplemental Information**

**Circuit Integration Initiation  
of New Hippocampal Neurons  
in the Adult Brain**

**Chih-Hao Yang, Adrian Di Antonio, Gregory W. Kirschen, Parul Varma, Jenny Hsieh, and Shaoyu Ge**

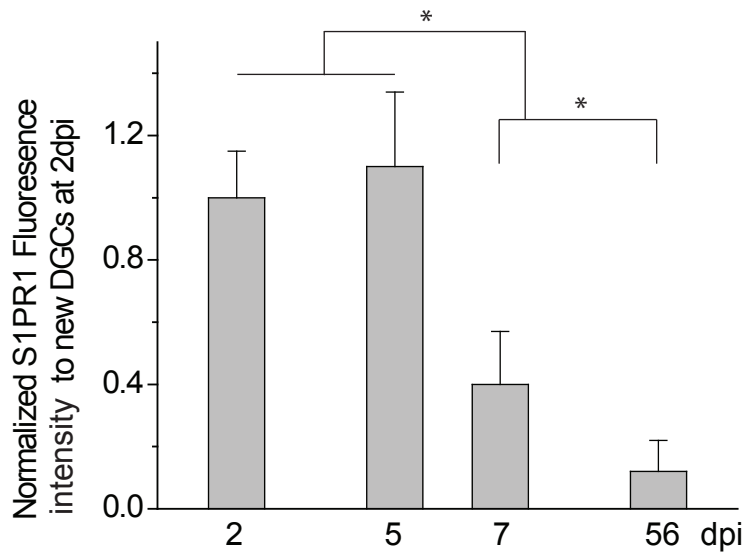

**Figure S1. S1PR1 expression profile along DGC development (related to Figure 2).** Normalized fluorescence intensity of S1PR1 signal at various time points. One-way ANOVA followed by post-hoc LSD tests, \* $P < 0.05$ . (n = 30 cells from 3-6 mice each condition)

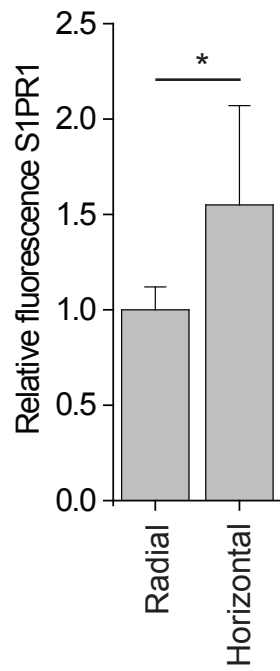

**Figure S2. Radial new DGCs express lower levels of S1PR1 compared to horizontal ones at 7 dpi (related to Figure 2).**

Normalized fluorescence intensity of S1PR1 signal comparing horizontal-to-radial GFP-labeled new DGCs at 7dpi. Unpaired t-test, \*P < 0.05. (n = 18 cells from 3 mice).

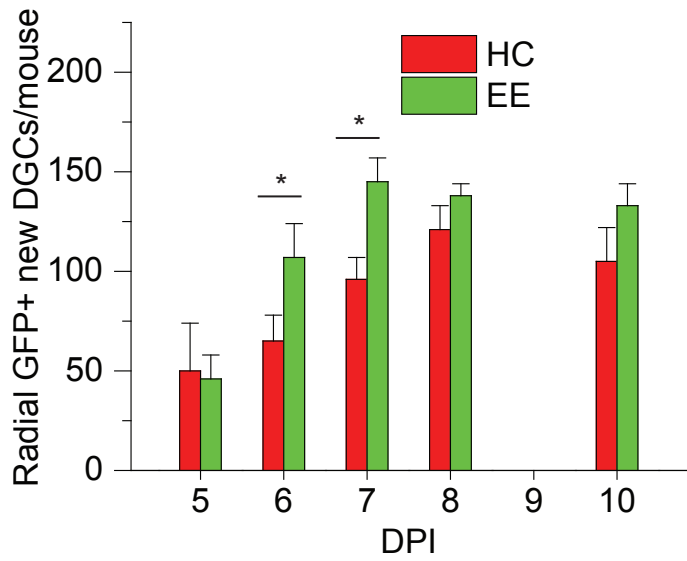

**Figure S3. Number of radially positioned new DGCs (related to Figure 4).**

The numbers of radially positioned GFP+ DGCs at 5, 7, 8, 10 dpi were counted from cohorts of 5–9 mice at each stage under HC and EE conditions. \*P < 0.05 (one-way ANOVA). (n = 40-50 cells from 3-4 mice).

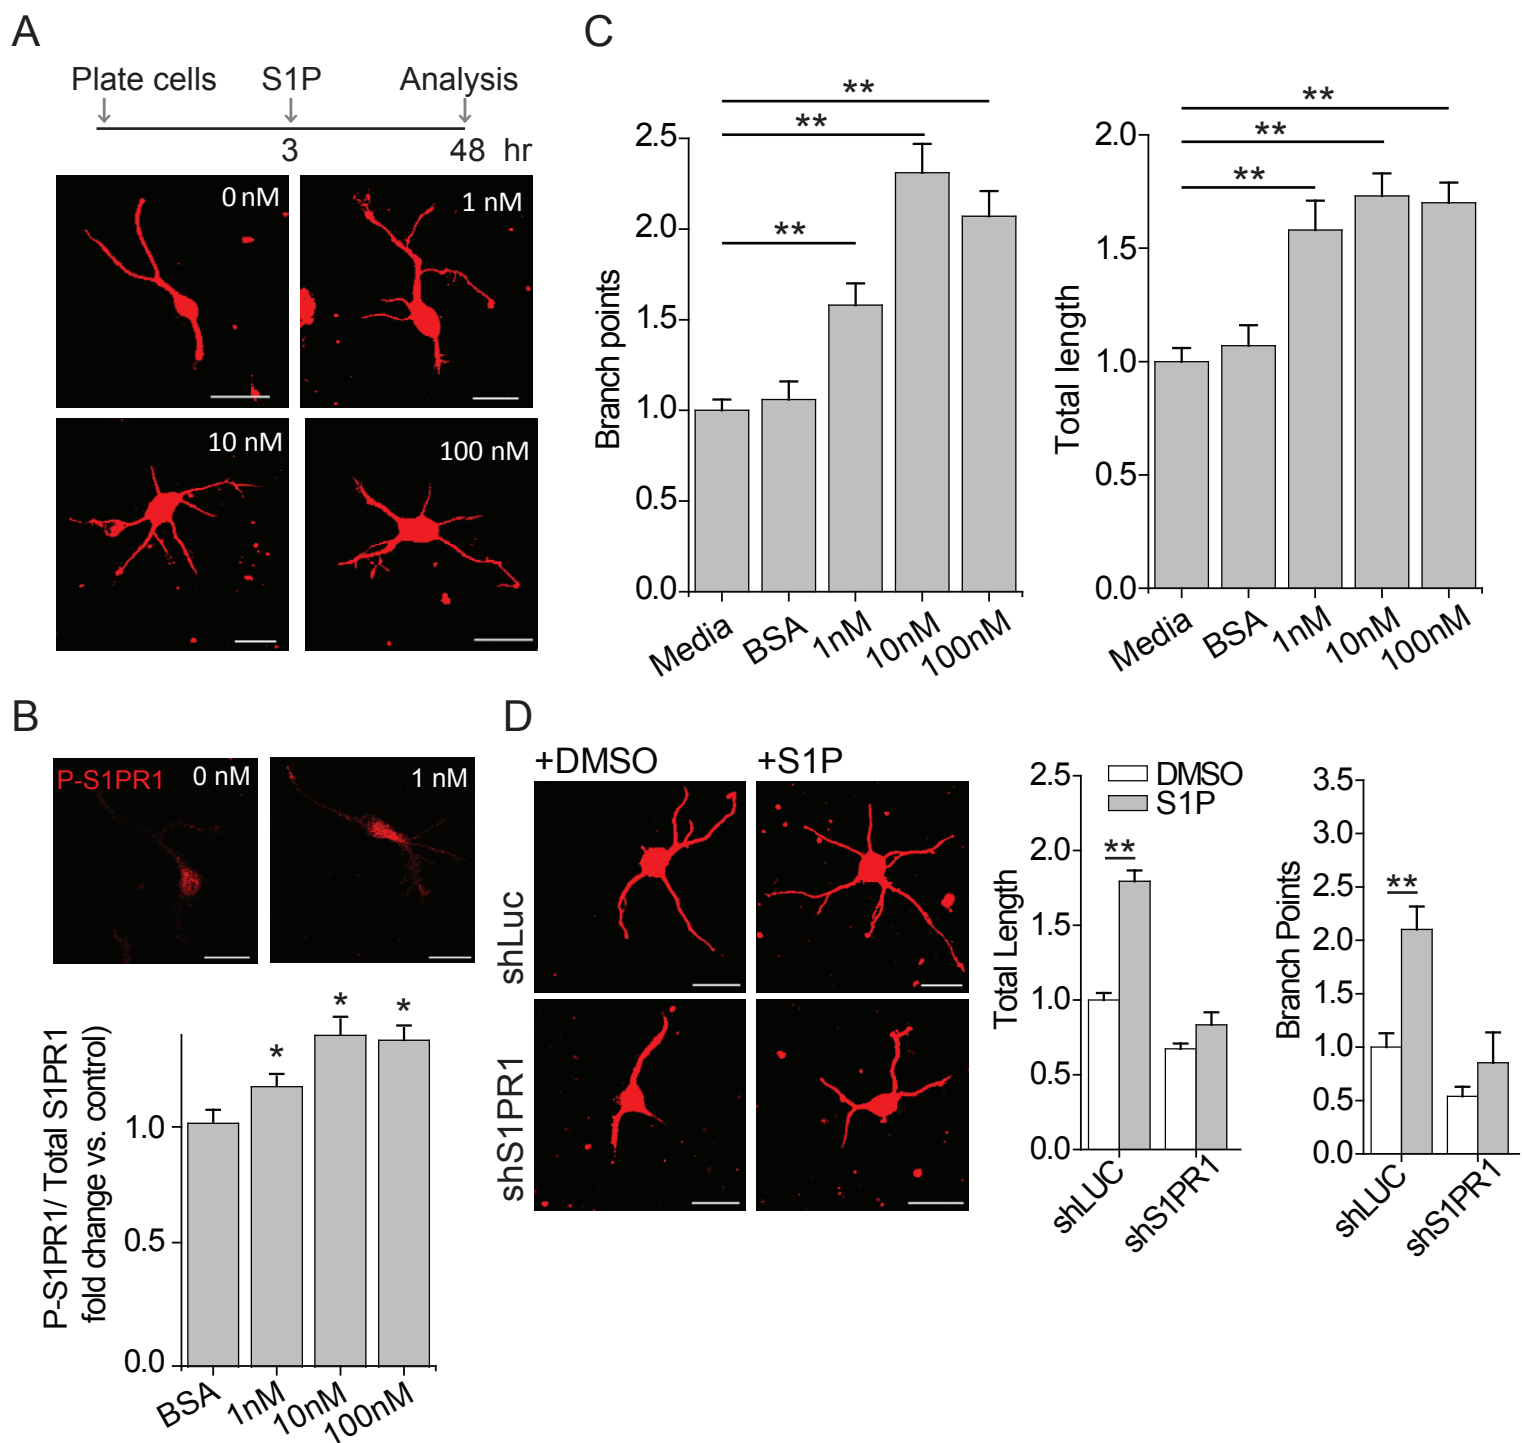

**Figure S4. S1P increases dendritic outgrowth of cultured DGCs (related to Figure 4).**

A) (Top) Experimental procedure of plating E18 hippocampal cells, adding S1P (or medium or BSA only as controls), and fixing cells at 48 h in vitro. (Bottom) Representative images of cultured cells from the various conditions. Scale bars, 20  $\mu$ m.

B) (Top) Representative images of P-S1PR1 immunostaining on hippocampal cells with or without S1P. (Bottom) Plot of the relative fluorescence of P-S1PR1 signals normalized to total S1PR1 signal for control (BSA only) from cells cultured with various concentrations of S1P. \*\* $P < 0.001$  ( $n = 30-40$  cells; one-way ANOVA).

C) Plot of the numbers of branch points and neurite lengths of cells cultured in medium only, BSA only, and with 1 nM, 10 nM, and 100 nM S1P. \*\* $P < 0.001$  ( $n = 60-70$  cells; one-way ANOVA).

D) (Left) Representative images of cultured neurons with either shLuc or shS1PR1 expression for 2 days. (Right) Plots of the lengths and numbers of branch points in cells cultured in DMSO or 10 nM S1P. \*\* $P < 0.001$  ( $n = 50-60$  cells; one-way ANOVA).

|                                             | Horizontal | Horizontal | Radial   | Radial    | Outermost granule cell layer (Radial) |
|---------------------------------------------|------------|------------|----------|-----------|---------------------------------------|
|                                             | 5dpi (8)   | 7dpi (6)   | 5dpi (9) | 7dpi (11) | Mature                                |
| Membrane resistance (ohm)                   | 602 ± 51   | 589 ± 49   | 618 ± 64 | 611 ± 37  | 247 ± 51                              |
| Membrane potential (mV)                     | -65 ± 8    | -67 ± 15   | -68 ± 16 | -64 ± 11  | -71 ± 8                               |
| Membrane capacitance (pF)                   | -10 ± 2    | -10 ± 1    | -12 ± 3  | -11 ± 2   | 14 ± 3                                |
| Action potential with 200ms-50pA injection  | Lack       | Lack       | Lack     | Lack      | 3.8 spikes                            |
| Action potential with 200ms-100pA injection | Lack       | Lack       | Lack     | Lack      | 10.5 spikes                           |

**Table S1. Membrane properties of new and mature DGCs (related to Figure 1).**

|                                                                        | Horizontal | Horizontal | Radial   | Radial    |
|------------------------------------------------------------------------|------------|------------|----------|-----------|
|                                                                        | 5dpi (9)   | 7dpi (6)   | 5dpi (9) | 7dpi (11) |
| Detected synaptic activity that can be blocked by 5 $\mu$ M Bicuculine | 0          | 0          | 2        | 4         |
| Lack of synaptic activity                                              | 9          | 6          | 7        | 7         |

**Table S2. GABAergic responses of horizontal and radial DGCs (related to Figure 1).**

Supplementary Table 3. Membrane properties of 7dpi new DGCs

|                           | shLuc    | shS1PR1  |
|---------------------------|----------|----------|
| Membrane resistance (ohm) | 523 ± 45 | 541 ± 37 |
| Membrane potential (mV)   | -67 ± 7  | -63 ± 11 |

**Table S3. Membrane properties of 7dpi new DGCs (related to Figure 3).**
